# Supplementary material for: Noise regularization removes correlation artifacts in single-cell RNA-seq data preprocessing
Source: PubMed Central journal article supplement — Patterns (N Y). 2021 Feb 15;2(3):100211. doi: 10.1016/j.patter.2021.100211 (PMC7961184; doi:10.1016/j.patter.2021.100211), 2021-02-15
Supplement: mmc1.pdf [file mmc1.pdf]

**Patterns, Volume 2**

**Supplemental information**

**Noise regularization removes correlation  
artifacts in single-cell RNA-seq  
data preprocessing**

**Ruoyu Zhang, Gurinder S. Atwal, and Wei Keat Lim**

**Figure S1. HCA single cell data used for this study**

A

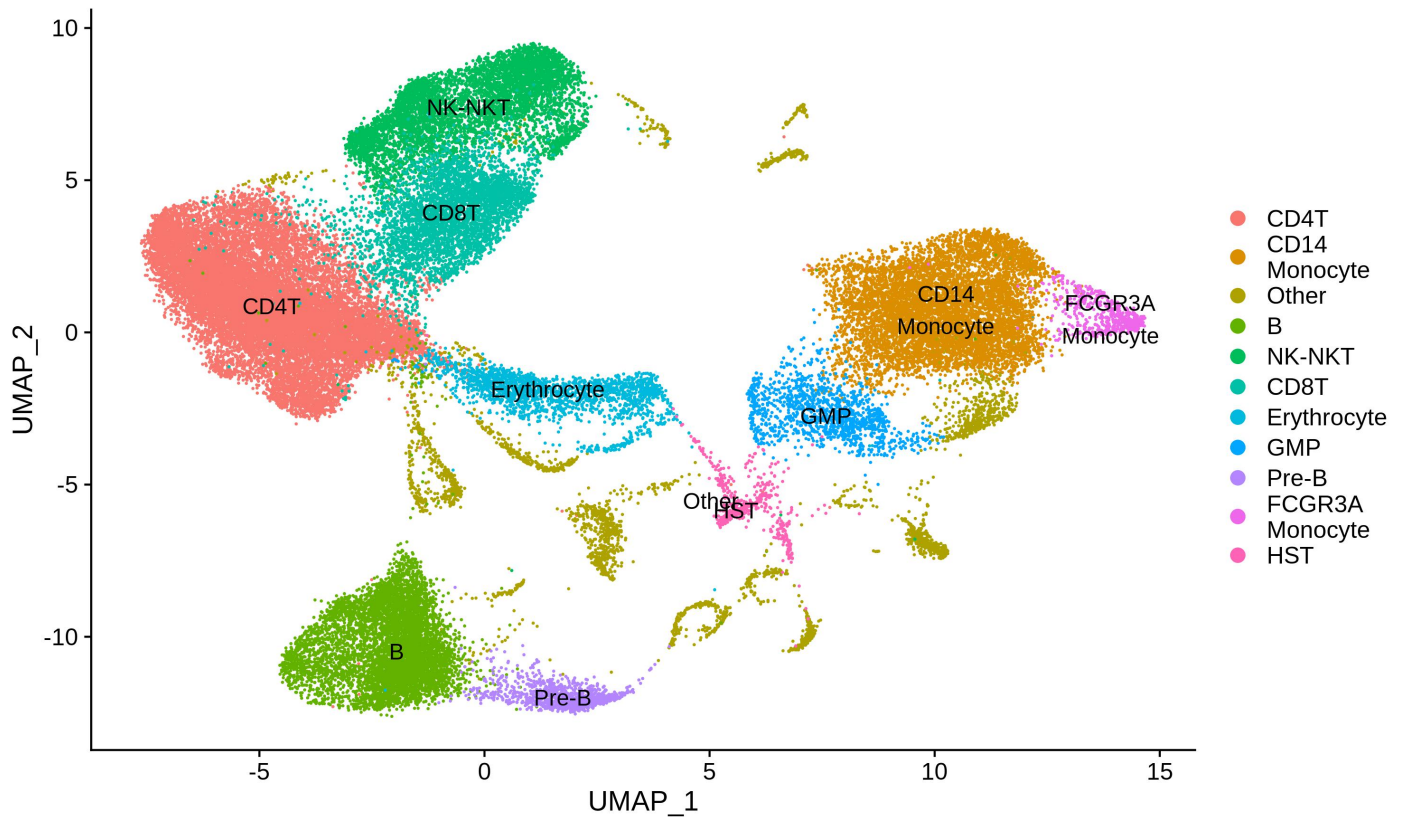

B

| Cluster        | 0        | 1             | 2        | 3      | 4     | 5           | 6      | 7        | 8               | 9        |
|----------------|----------|---------------|----------|--------|-------|-------------|--------|----------|-----------------|----------|
| Cell type      | CD4T     | CD14 Monocyte | B        | NK-NKT | CD8T  | Erythrocyte | GMP    | Pre-B    | FCGR3A Monocyte | HST      |
| Cell number    | 16936    | 7413          | 6534     | 5847   | 4467  | 1974        | 1347   | 1052     | 583             | 598      |
| Top 10 markers | IL7R     | S100A9        | CD79A    | GNLY   | GZMK  | HBB         | MPO    | CD79B    | LST1            | SPINK2   |
|                | LTB      | S100A8        | CD74     | NKG7   | RGS1  | AHSP        | ELANE  | HIST1H1C | IFITM3          | AVP      |
|                | TRAC     | S100A12       | IGHD     | GZMB   | CCL4  | CA1         | PRTN3  | TCL1A    | AIF1            | SOX4     |
|                | NOSIP    | LYZ           | MS4A1    | FGFBP2 | DUSP2 | HBD         | AZU1   | SOX4     | FCGR3A          | KIAA0125 |
|                | LEPROTL1 | FCN1          | IGHM     | GZMH   | CMC1  | PRDX2       | LYZ    | VPREB3   | COTL1           | ANKRD28  |
|                | PIK3IP1  | CXCL8         | HLA-DQB1 | PRF1   | CCL5  | HBA1        | CTSG   | CD24     | FCER1G          | IGLL1    |
|                | CD3D     | TYROBP        | HLA-DRA  | CST7   | GZMA  | BLVRB       | RETN   | NEIL1    | SERPINA1        | PRSS57   |
|                | LDHB     | VCAN          | HLA-DRB1 | KLRD1  | CST7  | HBA2        | RNASE2 | IGHM     | S100A11         | PRDX1    |
|                | MAL      | CSTA          | HLA-DPA1 | CCL5   | IL32  | TUBA1B      | LGALS1 | PCDH9    | SAT1            | H2AFY    |
|                | CD3E     | NAMPT         | HLA-DQA1 | KLRF1  | KLRB1 | TUBB        | H2AFZ  | VPREB1   | PSAP            | SERPINB1 |

**Figure S2. PPI enrichment of randomly sampled gene pairs.**

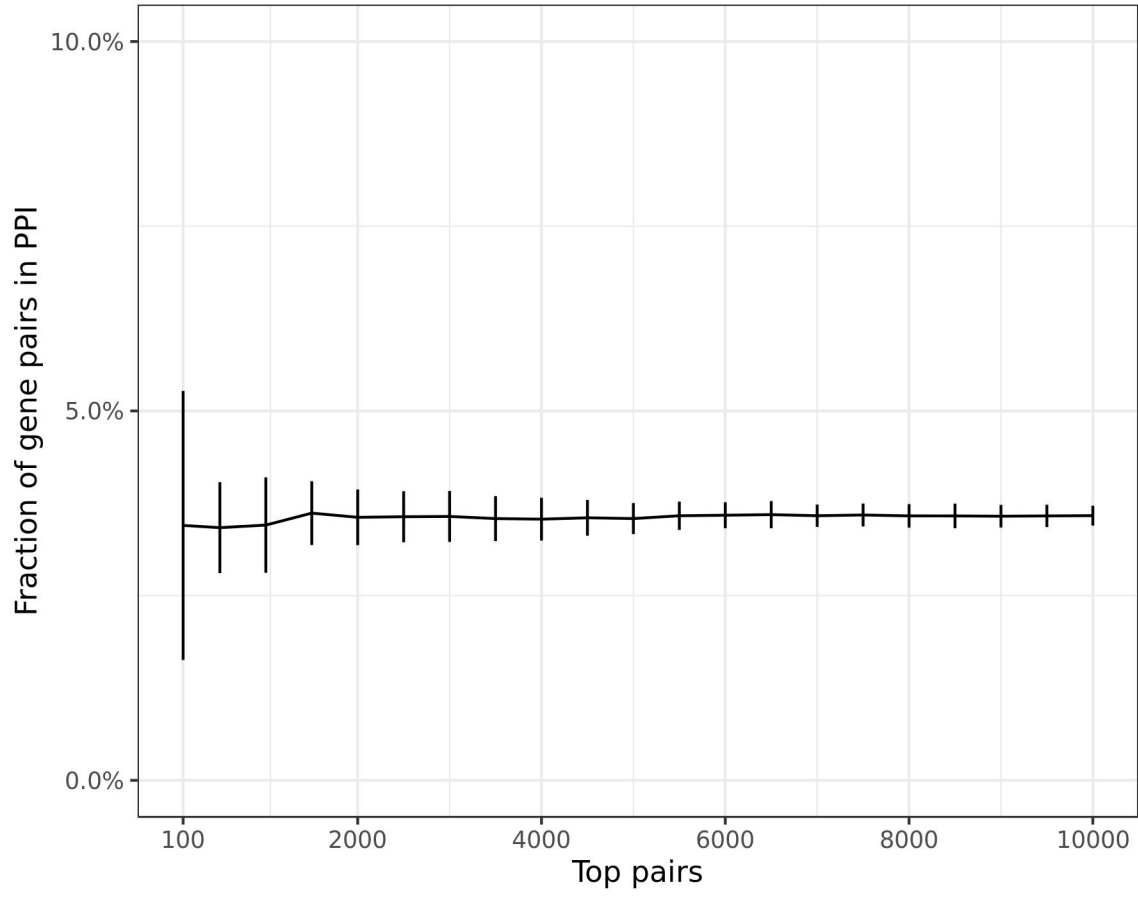

**Figure S3. Gene-gene correlation coefficients before and after noise regularization.**

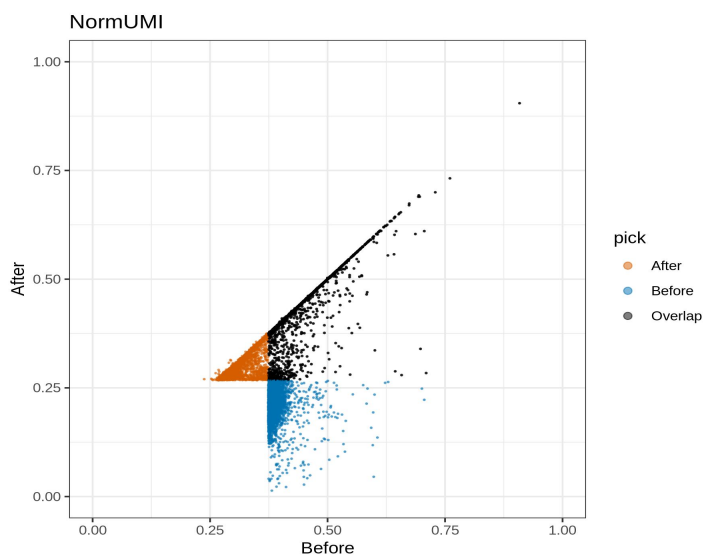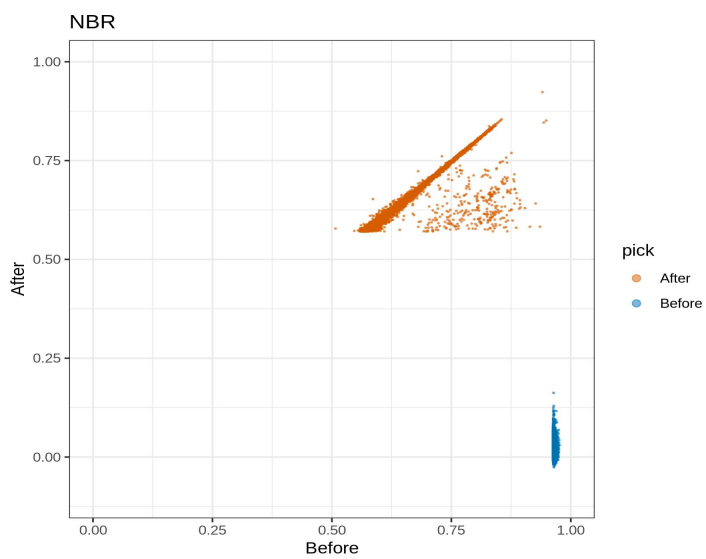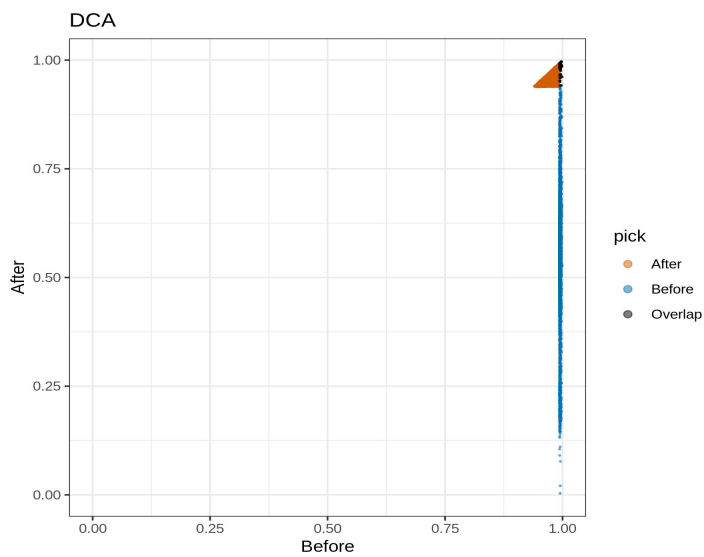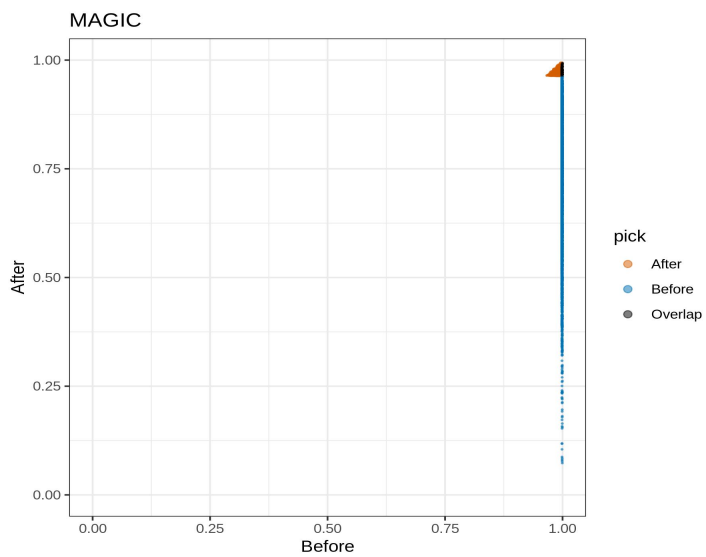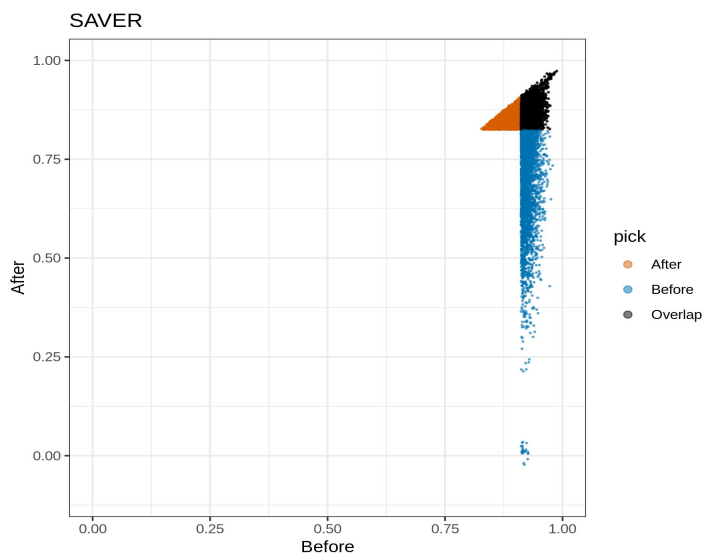

**Figure S4. Overlap of the top 5000 gene pairs before and after noise regularization in same method**

NormUMI

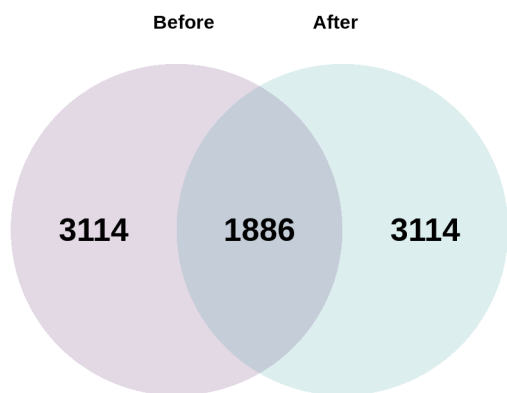

NBR

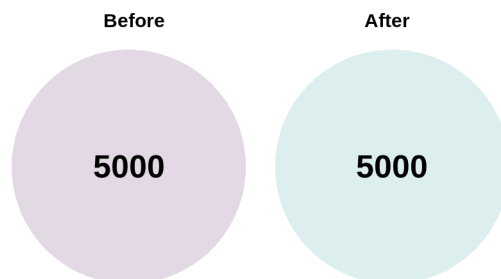

DCA

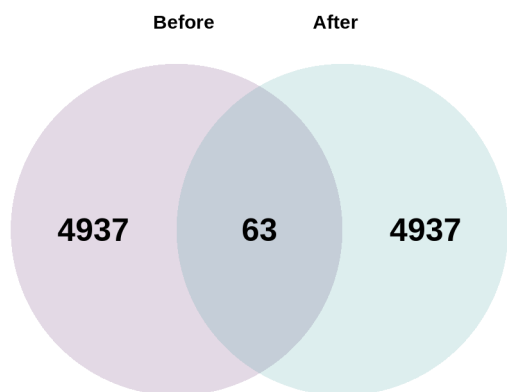

MAGIC

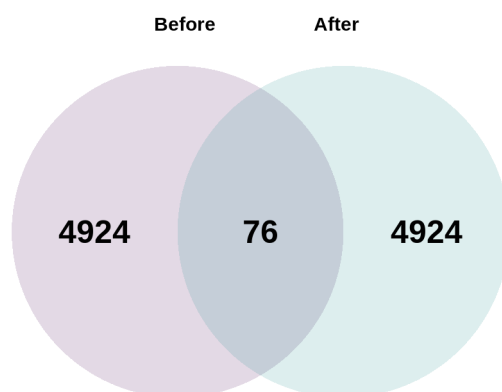

SAVER

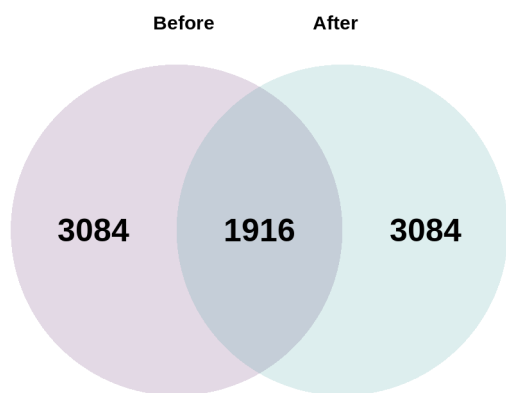

**Figure S5. Negative control gene pair before (left) and after (right) noise regularization**

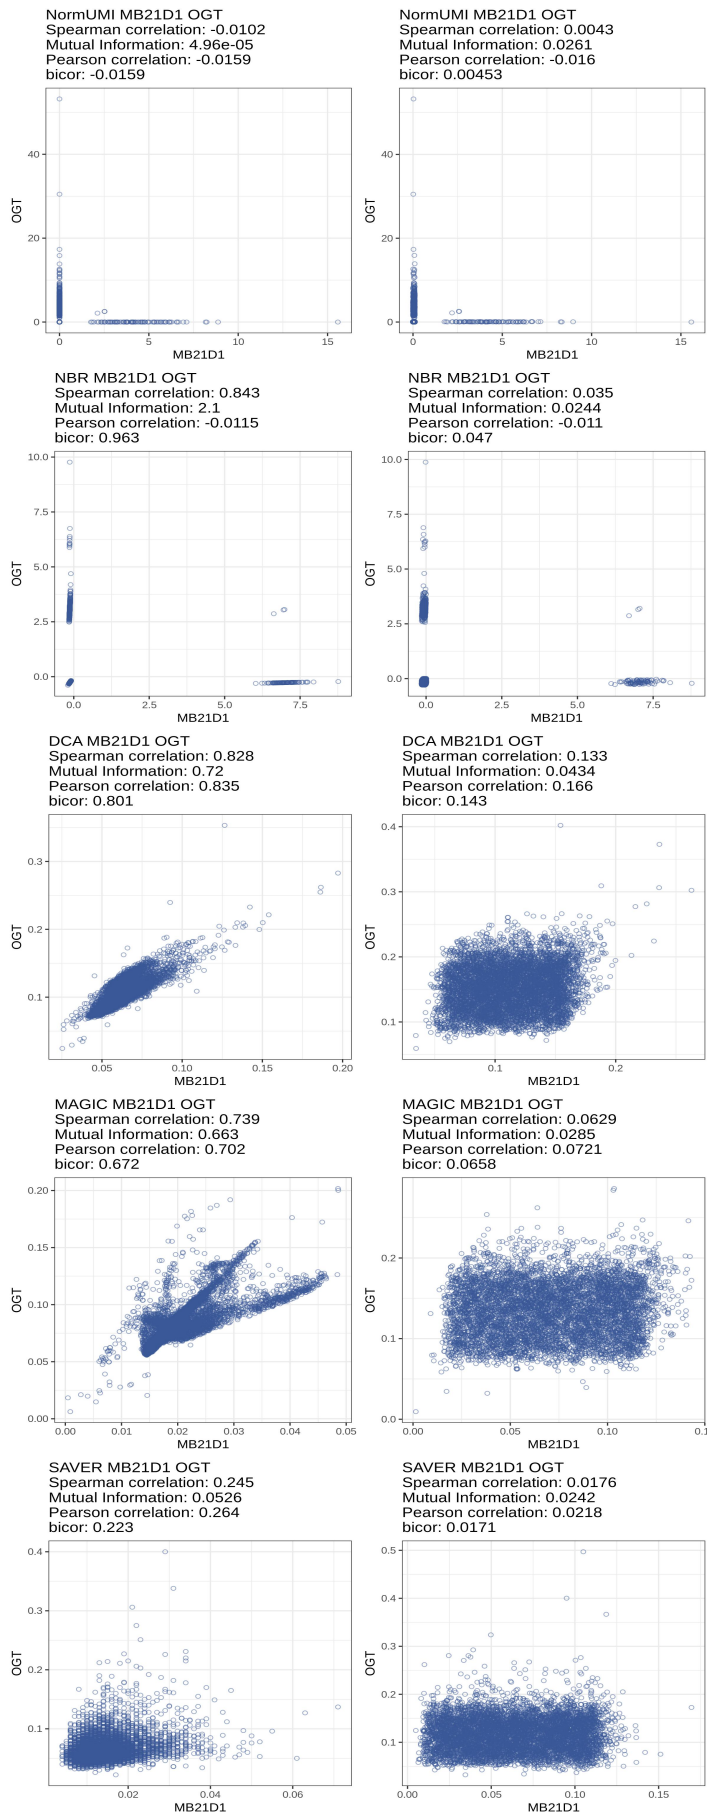

**Figure S6 Positive control pair MT-CO1, MT-CO2 before (left) and after (right) noise regularization**

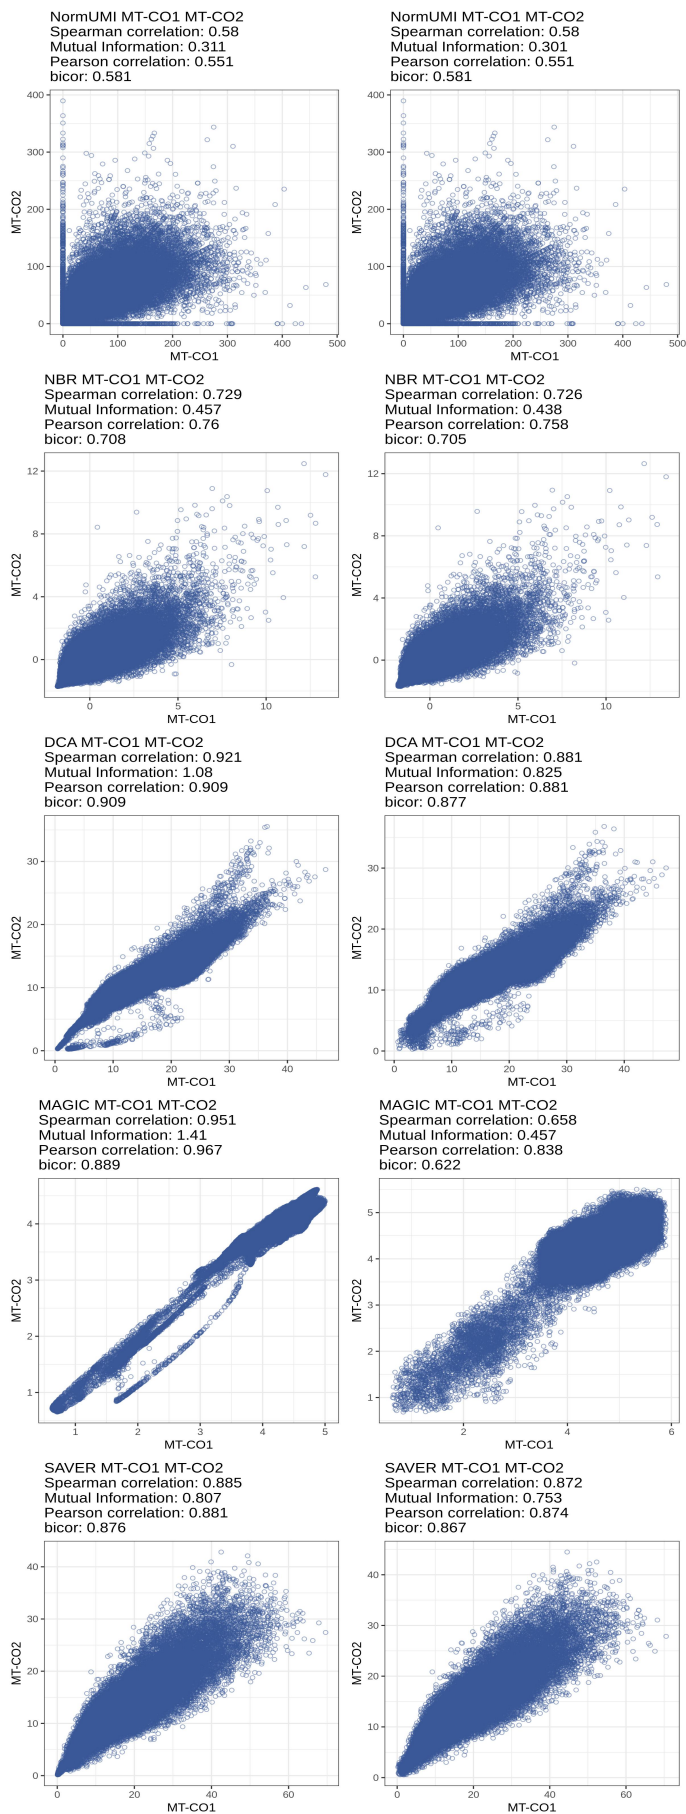

**Figure S7. Positive control pair S100A8, S100A9 before (left) and after (right) noise regularization**

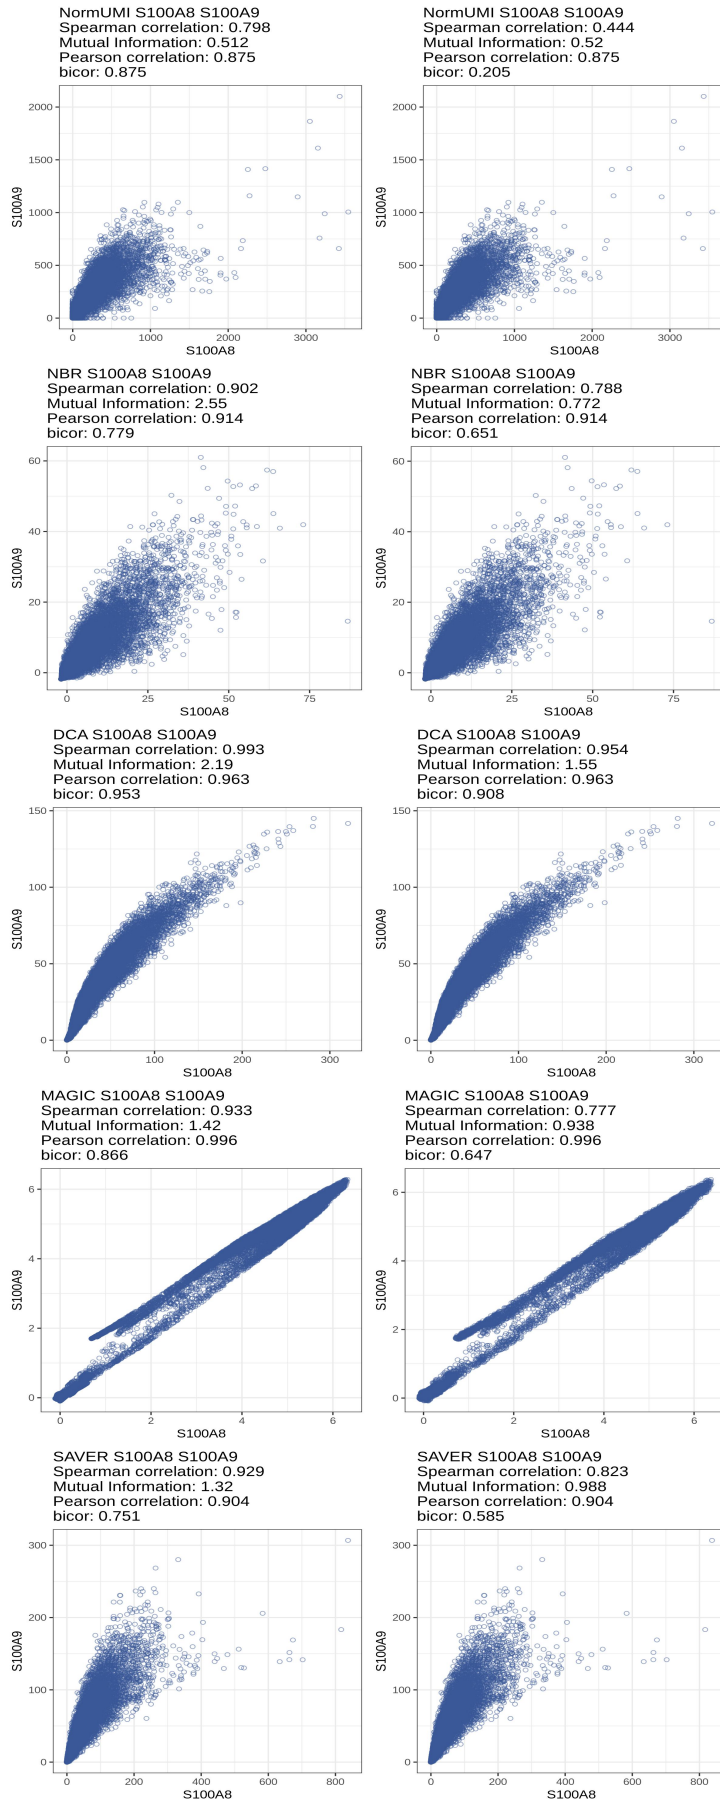



**Figure S8. PPI enrichment after adding noise at different levels**

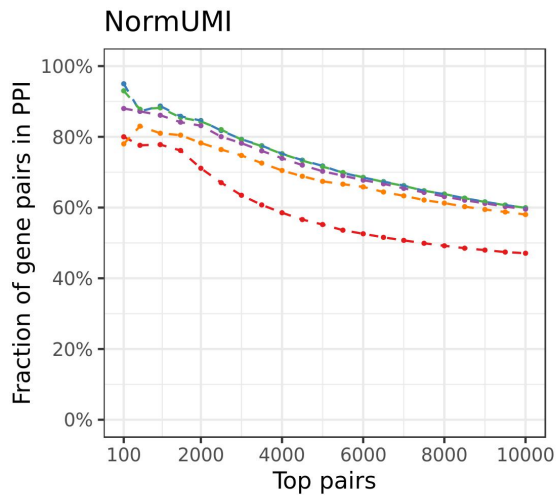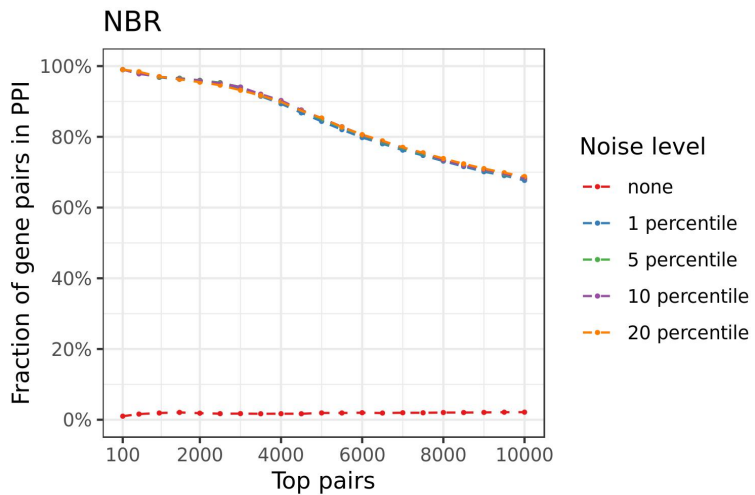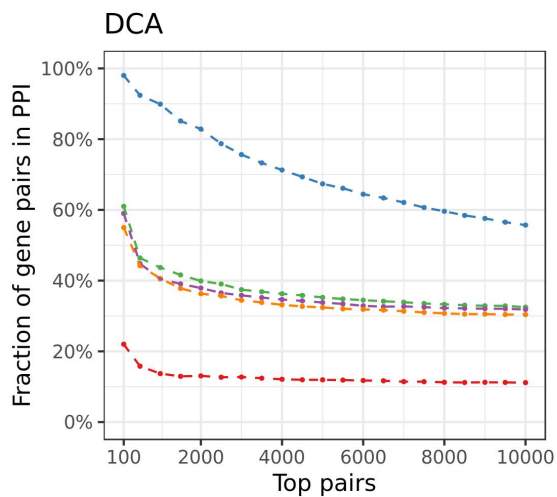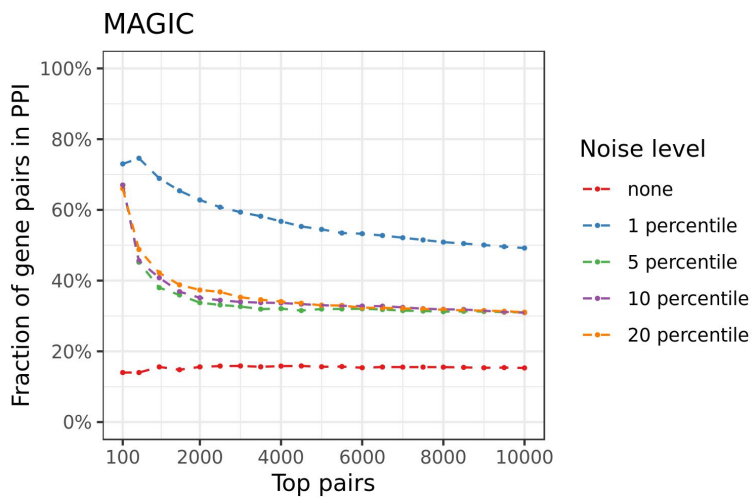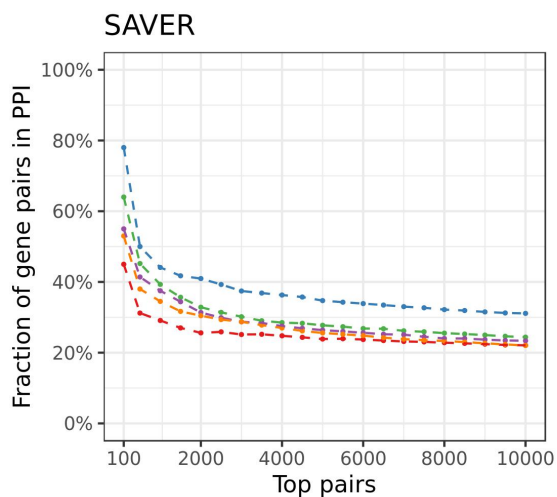

## Supplementary Figure Legend

**Figure S1. HCA single cell data used for this study.** (A) UMAP of 50,000 bone marrow cells, covering major immune cell types. (B) Cell type annotations, cell counts and the top 10 markers for the 10 biggest clusters in this dataset.

**Figure S2. PPI enrichment of randomly sampled gene pairs.** Gene pairs were randomly sampled and overlapped with PPI database to estimate the background enrichment level. The mean of the background enrichment is ~3.6%, error bar represents one standard deviation based on 20 random samplings.

**Figure S3. Gene-gene correlation coefficients before and after noise regularization.** From each preprocessing methods, top 5000 gene pairs (ranked by correlation coefficients) were selected before and after noise regularization, respectively. The top 5000 pairs before noise regularization were colored as blue, the top pairs selected after regularization were colored as brown, and the overlapped gene pairs were colored as black. The top 5000 gene pairs before regularization (blue and black dots together) had a wide range of correlations after regularization. On the contrary, the top 5000 gene pairs selected after regularization (red and black dots) were also highly correlated before the regularization.

**Figure S4. Overlap of the top 5000 gene pairs before and after noise regularization in same method.** Venn diagrams of the top 5000 gene pairs selected before and after noise regularization.

**Figure S5. Negative control gene pair before (left) and after (right) noise regularization.** Scatter plot of expression values of a negative control gene pair, OGT and MB21D1, before and after noise regularization. The oversmoothed data points were randomized and the correlations were effectively diluted after regularization

**Figure S6. Positive control pair MT-CO1, MT-CO2 before (left) and after (right) noise regularization.** Scatter plot of expression values of an experimentally validated interacting gene pairs: MT-CO1 & MT-CO2, before (left panel) and after (right panel) noise regularization. This gene pairs had high correlation before noise regularization and preserved high correlations with the added noise.

**Figure S7. Positive control pair S100A8, S100A9 before (left) and after (right) noise regularization.** Scatter plot of expression values of an experimentally validated interacting gene pairs: S100A8 & S100A9, before (left panel) and after (right panel) noise regularization. This gene pairs had high correlation before noise regularization and preserved high correlations with the added noise.

**Figure S8. PPI enrichment after adding noise at different levels.** Different level of noise is applied to regularize the data (1, 5, 10, 20 percentile of the expression level). Noise at 1 percentile of the expression level produces the optimal PPI enrichment.
